# Supplementary material
Source: Springer Nature journal article supplement (https://www.springermedizin.de/resource/supplementary/12876_2004_100_MOESM3_ESM.pdf/9438696)

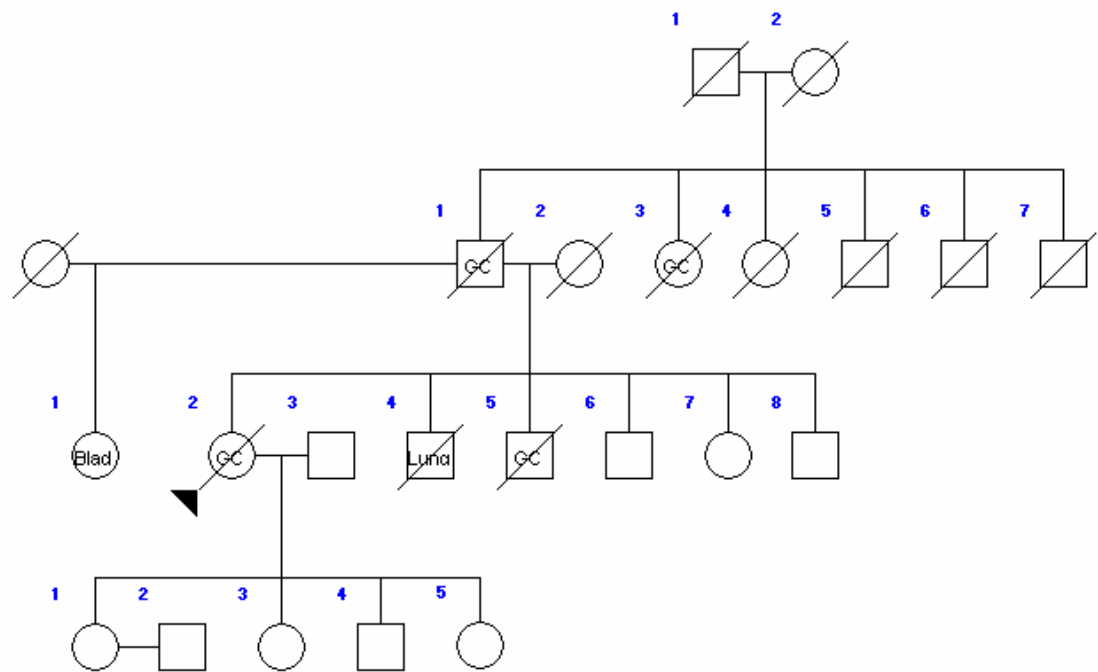

Supplement: MOESM3 [file 9438696]
